# Supplementary material
Source: PubMed Central journal article supplement (PMC4350025)
Supplement: supp_M114.041632_mcp.M114.041632-2.pdf [file supp_M114.041632_mcp.M114.041632-2.pdf]

Supplementary figure 1 Immunohistochemical staining pattern of sialyl Lewis a in colorectal cancer

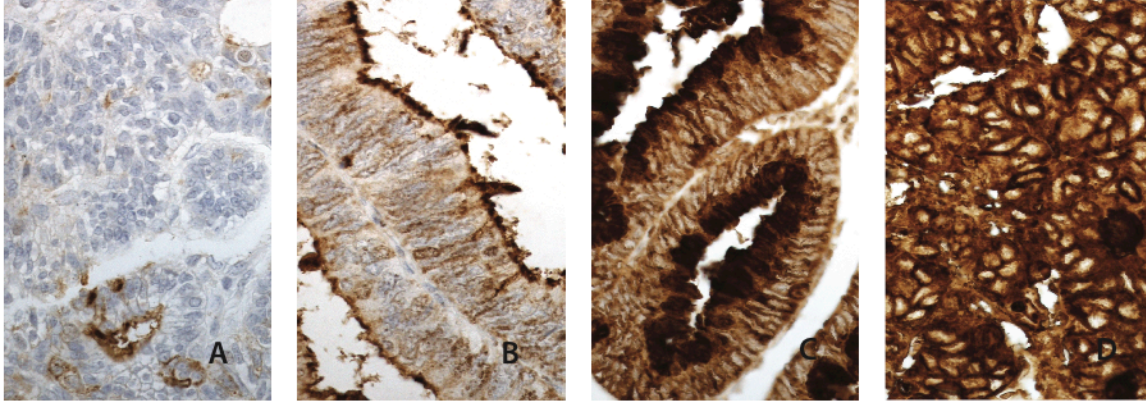

Representative images of sialyl Lewis a expression in colorectal cancer. (A) Sialyl Lewis a negative, (B) weak cytoplasmic positivity, (C) moderate cytoplasmic positivity, and (D) strong cytoplasmic positivity. Original magnification x 40.

**Supplementary figure 1**
