# Supplementary material
Source: PubMed Central journal article supplement (PMC4350025)
Supplement: supp_M114.041632_mcp.M114.041632-3.pdf [file supp_M114.041632_mcp.M114.041632-3.pdf]

Supplementary figure 2 Immunohistochemical staining pattern of low-mannose in colorectal cancer

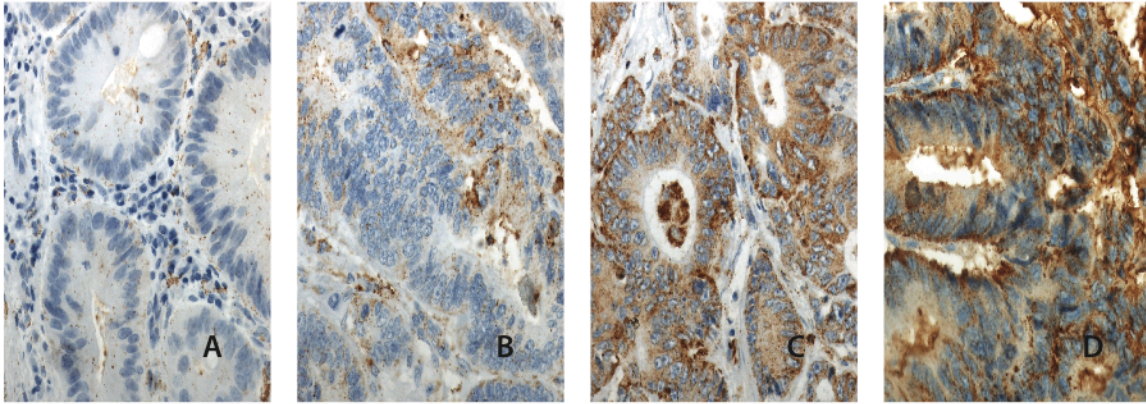

Representative images of lowmannose expression in colorectal cancer. (A) low-mannose negative, (B) weak cytoplasmic positivity, (C) moderate cytoplasmic positivity, and (D) strong cytoplasmic positivity. Original magnification x 40.

**Supplementary Figure 2**
