# Supplementary material
Source: PubMed Central journal article supplement (PMC4350025)
Supplement: supp_M114.041632_mcp.M114.041632-4.pdf [file supp_M114.041632_mcp.M114.041632-4.pdf]

**Supplementary table 2A Differences in neutral N-glycosylation between adenomas and carcinomas**

| Neutral N-glycan structure | Adenomas<br>(N=5)<br>Mean value<br>%(S.E.M.) | Carcinomas<br>(N=18)<br>Mean value<br>%(S.E.M.) | Ratio of means,<br>carcinoma/adenoma | P-<br>value* |
|----------------------------|----------------------------------------------|-------------------------------------------------|--------------------------------------|--------------|
| High-mannose type          | 63,50 (1,88)                                 | 53,97 (2,18)                                    | 0,85                                 | 0,024        |
| Monoantennary              | 20,39 (1,67)                                 | 28,46 (0,96)                                    | 1,40                                 | 0,0001       |
| Small high-mannose type    | 16,51 (1,28)                                 | 27,97 (2,42)                                    | 1,69                                 | 0,012        |
| Terminal HexNAc i          | 44,36 (3,42)                                 | 29,75 (2,14)                                    | 0,67                                 | 0,004        |
| Pauci-mannose              | 9,13 (0,89)                                  | 14,02 (2,11)                                    | 1,54                                 | 0,080        |

S.E.M.= Standard Error of the Mean \*=Mann-Whitney-test

**Supplementary table 2B Differences in acidic N-glycosylation between adenomas and carcinomas**

| Acidic N-glycan structure                     | Adenomas<br>(N=5)<br>Mean value %<br>(S.E.M.) | Carcinomas<br>(N=18)<br>Mean value %<br>(S.E.M.) | Ratio of means,<br>carcinoma/adenoma | P-<br>value* |
|-----------------------------------------------|-----------------------------------------------|--------------------------------------------------|--------------------------------------|--------------|
| Glycan size, N5                               | 20,41 (1,84)                                  | 10,62 (0,85)                                     | 0,52                                 | 0,0001       |
| Complex fucosylation                          | 36,67 (8,83)                                  | 15,07 (3,13)                                     | 0,41                                 | 0,002        |
| Sialylated                                    | 57,73 (9,54)                                  | 80,53 (4,62)                                     | 1,39                                 | 0,024        |
| Acidic ester                                  | 42,62 (9,55)                                  | 19,90 (4,63)                                     | 0,47                                 | 0,024        |
| Monoantennary                                 | 27,41 (4,10)                                  | 47,12 (3,94)                                     | 1,72                                 | 0,030        |
| Terminal HexNAc                               | 15,89 (1,79)                                  | 6,34 (1,27)                                      | 0,40                                 | 0,002        |
| Complex fucosylation in<br>sialylated glycans | 4,39 (0,91)                                   | 5,54 (0,53)                                      | 1,26                                 | 0.325        |

S.E.M.= Standard Error of the Mean \*=Mann-Whitney-test

**Supplementary table 2C Differences in acidic N-glycosylation between local and locoregional carcinomas**

| Acidic N-glycan structure | Local carcinoma<br>(N=8)<br>Mean value %<br>(S.E.M.) | Locoregional<br>carcinoma (N=4)<br>Mean value %<br>(S.E.M.) | Ratio of means,<br>Locoregional/local<br>carcinoma | P-<br>value* |
|---------------------------|------------------------------------------------------|-------------------------------------------------------------|----------------------------------------------------|--------------|
| Glycan size, N5           | 9,81 (0,86)                                          | 14,10 (1,80)                                                | 1,44                                               | 0.048        |
| Monoantennary             | 55,12 (4,55)                                         | 32,02 (8,89)                                                | 0,58                                               | 0.048        |

S.E.M.= Standard Error of the Mean \*=Mann-Whitney-test

**Supplementary table 2D Differences in acidic N-glycan signals between local and advanced carcinomas**

| Acidic N-glycan signal | Local carcinoma<br>(N=8)<br>Mean value %<br>(S.E.M.) | Advanced carcinoma<br>(N=10)<br>Mean value %<br>(S.E.M.) | Ratio of means,<br>advanced/local<br>carcinoma | P-<br>value* |
|------------------------|------------------------------------------------------|----------------------------------------------------------|------------------------------------------------|--------------|
| H5N4P1                 | 0,14 (0,05)                                          | 1,29 (0,68)                                              | 9,46                                           | 0.021        |
| H4N5F1P1               | 0,12 (0,03)                                          | 0,78 (0,28)                                              | 6,35                                           | 0.012        |
| H5N4F1P1               | 0,70 (0,23)                                          | 3,80 (1,29)                                              | 5,40                                           | 0.009        |
| H4N5F2P1               | 0,28 (0,10)                                          | 0,84 (0,24)                                              | 3,05                                           | 0.034        |
| H5N4F2P1               | 0,41 (0,13)                                          | 1,20 (0,35)                                              | 2.91                                           | 0.027        |

S.E.M.= Standard Error of the Mean \*=Mann-Whitney-test
