# Supplementary material
Source: PubMed Central journal article supplement (PMC4350025)
Supplement: supp_M114.041632_mcp.M114.041632-5.pdf [file supp_M114.041632_mcp.M114.041632-5.pdf]

**Supplementary table 3A Association of sialyl Lewis a expression and clinicopathological parameters**

| n (%)              | Sialyl Lewis a expression |                  | p-value |
|--------------------|---------------------------|------------------|---------|
|                    | Low<br>143(66.5)          | High<br>72(33.5) |         |
| <b>Age, years</b>  |                           |                  |         |
| <65                | 63 (44.1)                 | 36 (50.0)        | 0.409   |
| ≥65                | 80 (55.9)                 | 36 (50.0)        |         |
| <b>Gender</b>      |                           |                  |         |
| Male               | 86 (60.1)                 | 45 (62.5)        | 0.738   |
| Female             | 57 (39.9)                 | 27 (37.5)        |         |
| <b>Dukes</b>       |                           |                  |         |
| A-B                | 76 (53.1)                 | 29 (40.3)        | 0.075   |
| C-D                | 67 (46.9)                 | 43 (59.7)        |         |
| <b>Grade (WHO)</b> |                           |                  |         |
| 1-2                | 119 (85.0)                | 51 (72.9)        | 0.035   |
| 3-4                | 21 (15.0)                 | 19 (27.1)        |         |
| Missing            | 3                         | 2                |         |
| <b>Location</b>    |                           |                  |         |
| Colon              | 59 (41.3)                 | 25 (34.7)        | 0.354   |
| Rectum             | 84 (58.7)                 | 47 (65.3)        |         |
| <b>Side</b>        |                           |                  |         |
| Right              | 35 (24.5)                 | 14 (19.4)        | 0.407   |
| Left               | 108 (75.5)                | 58 (80.6)        |         |
| <b>Histology</b>   |                           |                  |         |
| Adenomatous        | 137 (95.8)                | 66 (93.0)        | 0.375   |
| Mucinous           | 6 (4.2)                   | 5 (7.0)          |         |
| Missing            |                           | 1                |         |

Chi-square-test was used. Missing data is not included in the analyses.

**Supplementary table 3B Association of Pauci-mannose expression and clinicopathological parameters**

| n (%)              | Pauci-mannose expression |                  | p-value |
|--------------------|--------------------------|------------------|---------|
|                    | Low<br>115(55.3)         | High<br>93(44.7) |         |
| <b>Age, years</b>  |                          |                  |         |
| <65                | 43(46.2)                 | 42(45.2)         | 0.894   |
| ≥65                | 62(53.8)                 | 51(54.8)         |         |
| <b>Gender</b>      |                          |                  |         |
| Male               | 72(62.6)                 | 55(59.1)         | 0.610   |
| Female             | 43(37.4)                 | 38(40.9)         |         |
| <b>Dukes</b>       |                          |                  |         |
| A-B                | 53(46.1)                 | 49(52.7)         | 0.344   |
| C-D                | 62(53.9)                 | 44(47.3)         |         |
| <b>Grade (WHO)</b> |                          |                  |         |
| 1-2                | 91(79.8)                 | 72(80.0)         | 0.975   |
| 3-4                | 23(20.2)                 | 18(20.0)         |         |
| Missing            | 1                        | 3                |         |
| <b>Location</b>    |                          |                  |         |
| Colon              | 45(39.1)                 | 40(43.0)         | 0.571   |
| Rectum             | 70(60.9)                 | 53(57.0)         |         |
| <b>Side</b>        |                          |                  |         |
| Right              | 30(26.1)                 | 20(21.5)         | 0.442   |
| Left               | 85(73.9)                 | 73(78.5)         |         |
| <b>Histology</b>   |                          |                  |         |
| Adenomatous        | 104(91.2)                | 92(98.9)         | 0.014   |
| Mucinous           | 10(8.8)                  | 1(1.1)           |         |
| Missing            | 1                        |                  |         |

Chi-square-test was used. Missing data is not included in the analyses.
